# Supplementary material for: Heterogeneities among credit risk parameter distributions: the modality defines the best estimation method
Source: Springer Nature journal article supplement (doi:10.1007/s00291-022-00689-6), 2022-09-08
Supplement: MOESM1 [file 23469772]

**Online appendix / Supplementary materials**

## Figures

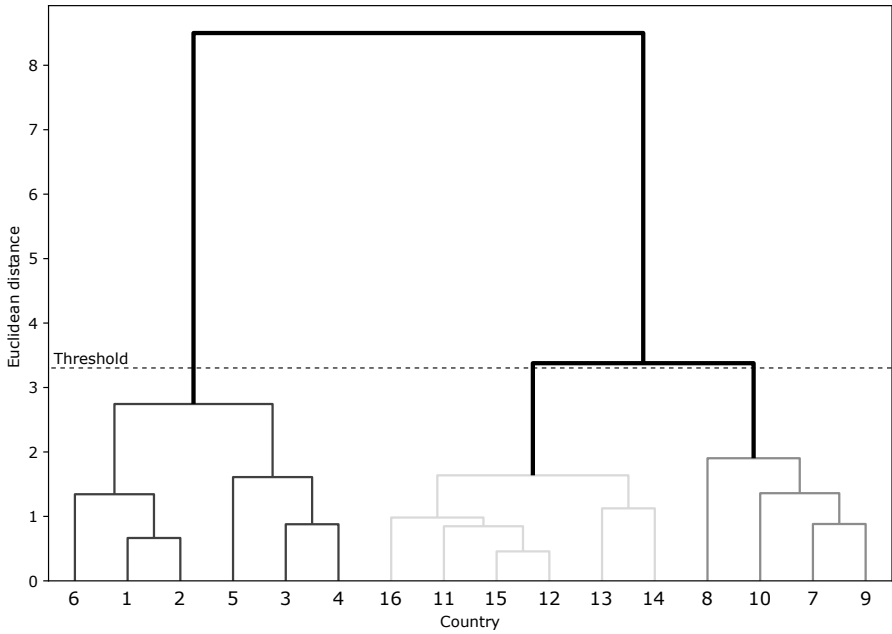

**Figure OA.1: European credit portfolios: Dendrogram of the agglomerative hierarchical clustering.**

Note. The country names are made anonymous owing to a non-disclosure agreement. The dendrogram is interpreted as follows: First, each part of the x-axis corresponds to the LGD distribution of a specific country and represents an initial cluster. Second, horizontal lines are merged clusters and vertical lines indicate which clusters were part of forming that new cluster. Third, the heights of the horizontal lines (y-axis) show the distance, that is, the (dis)similarity among the merged clusters. The key to determining the final number of clusters is to focus on the heights. By inserting a predefined threshold (dashed horizontal line), which defines the maximal distance (dissimilarity) among all clusters, the number of clusters is given by the number of vertical lines that cross this threshold. Given that three vertical lines cross the threshold, we end up with three final clusters.

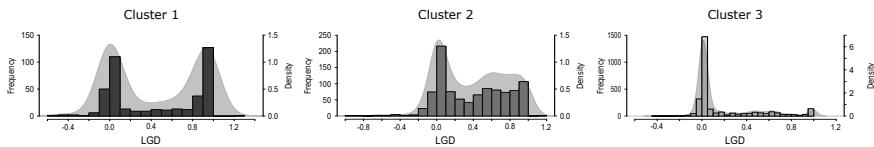

**Figure OA.2: Inclusion of enterprise-specific variables: LGD frequency and approximated density distributions of the European clusters.**

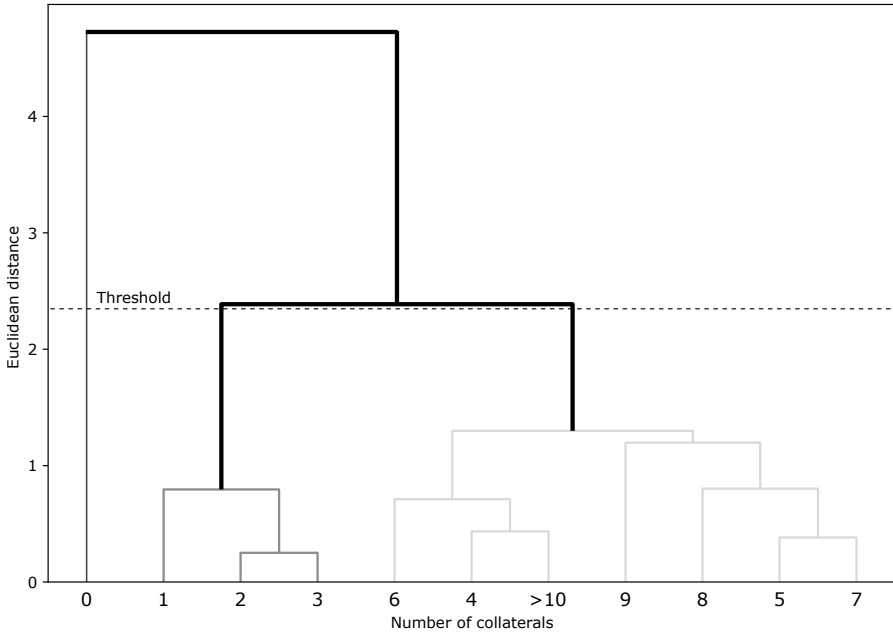

**Figure OA.3: Clustering based on loan-specific variable: Dendrogram of the agglomerative hierarchical clustering.**

Note. The dendrogram is interpreted as follows: First, each part of the x-axis corresponds to the LGD distribution of a specific number of collaterals and represents an initial cluster. Second, horizontal lines are merged clusters and vertical lines indicate which clusters were part of forming that new cluster. Third, the heights of the horizontal lines (y-axis) show the distance, that is, the (dis)similarity among the merged clusters. The key to determining the final number of clusters is to focus on the heights. By inserting a predefined threshold (dashed horizontal line), which defines the maximal distance (dissimilarity) among all clusters, the number of clusters is given by the number of vertical lines that cross this threshold. Given that three vertical lines cross the threshold, we end up with three final clusters.

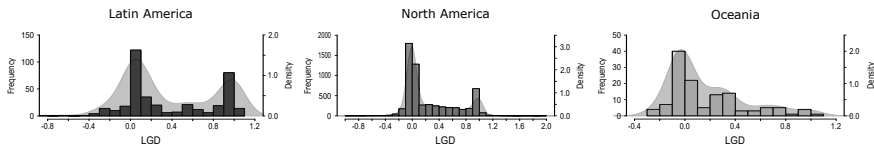

**Figure OA.4: Non-European credit portfolios: LGD frequency and approximated density distributions.**

## Tables

**Table OA.1: European credit portfolios: Test statistics for the comparisons of the LGD distributions.**

Note. Values are paired t statistics and U statistics, respectively. †, \*, \*\*, and \*\*\* imply significance at the 10%, 5%, 1%, and 0.1% levels

| <b>Paired t-tests</b> |             |            |           |
|-----------------------|-------------|------------|-----------|
|                       | Cluster 1   | Cluster 2  | Cluster 3 |
| Cluster 1             | -           |            |           |
| Cluster 2             | -12.1608*** | -          |           |
| Cluster 3             | 22.5953***  | 30.9241*** | -         |

  

| <b>Paired Mann-Whitney U tests</b> |            |            |           |
|------------------------------------|------------|------------|-----------|
|                                    | Cluster 1  | Cluster 2  | Cluster 3 |
| Cluster 1                          | -          |            |           |
| Cluster 2                          | 5.1E+07*** | -          |           |
| Cluster 3                          | 3.0E+07*** | 4.1E+06*** | -         |

**Table OA.2: European credit portfolios: Paired t-test for comparisons of mean MSE of the TOP5 methods.**

Note. Values are paired t statistics where a negative value means the mean MSE (that is, the MSEs of all splits are considered) for the method on the vertical axis is worse than that for the method on the horizontal axis, and vice versa. †, \*, \*\*, and \*\*\* imply significance at the 10%, 5%, 1%, and 0.1% levels.

| <b>Cluster 1: (nearly) symmetric bimodal LGD distribution</b> |           |           |            |            |            |
|---------------------------------------------------------------|-----------|-----------|------------|------------|------------|
|                                                               | <i>RF</i> | <i>GB</i> | <i>SVR</i> | <i>CUB</i> | <i>CIT</i> |
| <i>RF</i>                                                     | -         |           |            |            |            |
| <i>GB</i>                                                     | -2.0898*  | -         |            |            |            |
| <i>SVR</i>                                                    | -2.4173*  | -0.5926   | -          |            |            |
| <i>CUB</i>                                                    | -2.4362*  | -0.4377   | -0.1006    | -          |            |
| <i>CIT</i>                                                    | -2.8967** | -0.7428   | -0.1859    | -0.2637    | -          |

  

| <b>Cluster 2: asymmetric (positively skewed) bimodal LGD distribution</b> |           |           |             |            |            |
|---------------------------------------------------------------------------|-----------|-----------|-------------|------------|------------|
|                                                                           | <i>GB</i> | <i>RF</i> | <i>GAPR</i> | <i>SVR</i> | <i>CUB</i> |
| <i>GB</i>                                                                 | -         |           |             |            |            |
| <i>RF</i>                                                                 | -2.4225*  | -         |             |            |            |
| <i>GAPR</i>                                                               | -2.9307** | -0.5263   | -           |            |            |
| <i>SVR</i>                                                                | -3.1412** | -0.7891   | -0.2727     | -          |            |
| <i>CUB</i>                                                                | -3.1659** | -0.8689   | -0.3644     | -0.0963    | -          |

  

| <b>Cluster 3: (positively skewed) unimodal LGD distribution</b> |            |           |           |            |            |
|-----------------------------------------------------------------|------------|-----------|-----------|------------|------------|
|                                                                 | <i>FMM</i> | <i>RF</i> | <i>GB</i> | <i>CUB</i> | <i>SVR</i> |
| <i>FMM</i>                                                      | -          |           |           |            |            |
| <i>RF</i>                                                       | -4.3298*** | -         |           |            |            |
| <i>GB</i>                                                       | -4.9064*** | -0.4211   | -         |            |            |
| <i>CUB</i>                                                      | -5.8791*** | -1.3845   | -0.9880   | -          |            |
| <i>SVR</i>                                                      | -7.4937*** | -1.7184   | -1.2601   | -0.0848    | -          |

**Table OA.3: European credit portfolios: Paired t-test for comparisons of mean MAE of the TOP5 methods.**

Note. Values are paired t statistics where a negative value means the mean MAE (that is, the MAEs of all splits are considered) for the method on the vertical axis is worse than that for the method on the horizontal axis, and vice versa. †, \*, \*\*, and \*\*\* imply significance at the 10%, 5%, 1%, and 0.1% levels.

| <b>Cluster 1: (nearly) symmetric bimodal LGD distribution</b> |                      |            |            |            |           |
|---------------------------------------------------------------|----------------------|------------|------------|------------|-----------|
|                                                               | <i>RF</i>            | <i>CUB</i> | <i>RVR</i> | <i>ANN</i> | <i>GB</i> |
| <i>RF</i>                                                     | -                    |            |            |            |           |
| <i>CUB</i>                                                    | -1.7231 <sup>†</sup> | -          |            |            |           |
| <i>RVR</i>                                                    | -1.7952 <sup>†</sup> | -1.0942    | -          |            |           |
| <i>ANN</i>                                                    | -1.8380 <sup>†</sup> | -1.0850    | -1.1446    | -          |           |
| <i>GB</i>                                                     | -1.8430 <sup>†</sup> | -1.0655    | -1.0643    | -1.2362    | -         |

  

| <b>Cluster 2: asymmetric (positively skewed) bimodal LGD distribution</b> |                        |                        |            |            |            |
|---------------------------------------------------------------------------|------------------------|------------------------|------------|------------|------------|
|                                                                           | <i>GB</i>              | <i>CUB</i>             | <i>SVR</i> | <i>ANN</i> | <i>KNN</i> |
| <i>GB</i>                                                                 | -                      |                        |            |            |            |
| <i>CUB</i>                                                                | -2.1196 <sup>*</sup>   | -                      |            |            |            |
| <i>SVR</i>                                                                | -2.1282 <sup>*</sup>   | -2.0823 <sup>*</sup>   | -          |            |            |
| <i>ANN</i>                                                                | -2.6928 <sup>**</sup>  | -2.6324 <sup>**</sup>  | -1.5587    | -          |            |
| <i>KNN</i>                                                                | -3.4347 <sup>***</sup> | -3.3545 <sup>***</sup> | -1.2826    | -0.7213    | -          |

  

| <b>Cluster 3: (positively skewed) unimodal LGD distribution</b> |                       |                      |            |           |            |
|-----------------------------------------------------------------|-----------------------|----------------------|------------|-----------|------------|
|                                                                 | <i>FMM</i>            | <i>RF</i>            | <i>CUB</i> | <i>GB</i> | <i>KNN</i> |
| <i>FMM</i>                                                      | -                     |                      |            |           |            |
| <i>RF</i>                                                       | -2.1147 <sup>*</sup>  | -                    |            |           |            |
| <i>CUB</i>                                                      | -2.1283 <sup>*</sup>  | -1.5338              | -          |           |            |
| <i>GB</i>                                                       | -2.2824 <sup>*</sup>  | -1.9198              | -0.3436    | -         |            |
| <i>KNN</i>                                                      | -2.7165 <sup>**</sup> | -2.3386 <sup>*</sup> | -0.8078    | -0.4862   | -          |

**Table OA.4: European credit portfolios: Out-of-sample estimation accuracies ( $R^2$ ).**

Note. This table reports the  $R^2$  of the out-of-sample estimation for the considered LGD methods. Low values for  $R^2$  imply a bad fit.

| <b>Cluster 1: (nearly) symmetric bimodal LGD distribution</b>             |            |             |            |           |           |           |            |           |            |               |            |               |            |            |            |            |             |            |             |               |
|---------------------------------------------------------------------------|------------|-------------|------------|-----------|-----------|-----------|------------|-----------|------------|---------------|------------|---------------|------------|------------|------------|------------|-------------|------------|-------------|---------------|
| Split                                                                     | <i>OLS</i> | <i>bOLS</i> | <i>LAR</i> | <i>RR</i> | <i>LR</i> | <i>ER</i> | <i>FLR</i> | <i>RT</i> | <i>CIT</i> | <i>RF</i>     | <i>ADA</i> | <i>GB</i>     | <i>CUB</i> | <i>ANN</i> | <i>SVR</i> | <i>RVR</i> | <i>GAPR</i> | <i>KNN</i> | <i>MARS</i> | <i>FMM</i>    |
| 60/40                                                                     | 0.1733     | 0.1828      | 0.1715     | 0.1794    | 0.1807    | 0.1799    | 0.1828     | 0.1788    | 0.1613     | 0.2286        | 0.1719     | 0.1962        | 0.1817     | 0.1645     | 0.1765     | 0.1652     | 0.1746      | 0.1102     | 0.1729      | 0.1786        |
| 70/30                                                                     | 0.1769     | 0.1664      | 0.1778     | 0.1805    | 0.1813    | 0.1903    | 0.1818     | 0.1672    | 0.1878     | 0.2402        | 0.1709     | 0.1879        | 0.1916     | 0.1720     | 0.1872     | 0.1614     | 0.1860      | 0.1127     | 0.1771      | 0.1835        |
| 80/20                                                                     | 0.1960     | 0.1865      | 0.1953     | 0.1878    | 0.1882    | 0.1776    | 0.1806     | 0.1854    | 0.2092     | 0.2438        | 0.1963     | 0.2012        | 0.1925     | 0.1970     | 0.1897     | 0.1992     | 0.1954      | 0.1331     | 0.1798      | 0.1939        |
| 90/10                                                                     | 0.2093     | 0.2169      | 0.2108     | 0.2016    | 0.2008    | 0.2004    | 0.2019     | 0.2147    | 0.2105     | 0.2636        | 0.2145     | 0.2340        | 0.2059     | 0.2093     | 0.2251     | 0.2269     | 0.2107      | 0.1565     | 0.2269      | 0.2078        |
| Mean                                                                      | 0.1889     | 0.1881      | 0.1889     | 0.1873    | 0.1878    | 0.1870    | 0.1868     | 0.1865    | 0.1922     | <u>0.2440</u> | 0.1884     | 0.2048        | 0.1930     | 0.1857     | 0.1946     | 0.1882     | 0.1916      | 0.1281     | 0.1892      | 0.1909        |
| <b>Cluster 2: asymmetric (positively skewed) bimodal LGD distribution</b> |            |             |            |           |           |           |            |           |            |               |            |               |            |            |            |            |             |            |             |               |
| Split                                                                     | <i>OLS</i> | <i>bOLS</i> | <i>LAR</i> | <i>RR</i> | <i>LR</i> | <i>ER</i> | <i>FLR</i> | <i>RT</i> | <i>CIT</i> | <i>RF</i>     | <i>ADA</i> | <i>GB</i>     | <i>CUB</i> | <i>ANN</i> | <i>SVR</i> | <i>RVR</i> | <i>GAPR</i> | <i>KNN</i> | <i>MARS</i> | <i>FMM</i>    |
| 60/40                                                                     | 0.1934     | 0.1964      | 0.1935     | 0.1965    | 0.1964    | 0.1980    | 0.2043     | 0.2115    | 0.2140     | 0.2268        | 0.1435     | 0.2519        | 0.2147     | 0.2121     | 0.2168     | 0.2107     | 0.2214      | 0.2110     | 0.2148      | 0.2133        |
| 70/30                                                                     | 0.1991     | 0.1992      | 0.1991     | 0.1991    | 0.1993    | 0.1982    | 0.2103     | 0.2176    | 0.2202     | 0.2293        | 0.1490     | 0.2537        | 0.2198     | 0.2165     | 0.2187     | 0.2170     | 0.2231      | 0.2174     | 0.2181      | 0.2148        |
| 80/20                                                                     | 0.2036     | 0.2032      | 0.1945     | 0.1991    | 0.1976    | 0.1966    | 0.2074     | 0.2193    | 0.2221     | 0.2274        | 0.1585     | 0.2576        | 0.2214     | 0.2185     | 0.2235     | 0.2170     | 0.2238      | 0.2161     | 0.2107      | 0.2221        |
| 90/10                                                                     | 0.2167     | 0.2119      | 0.2100     | 0.2122    | 0.2120    | 0.2088    | 0.2121     | 0.2293    | 0.2374     | 0.2495        | 0.1670     | 0.2701        | 0.2440     | 0.2270     | 0.2452     | 0.2257     | 0.2420      | 0.2267     | 0.2367      | 0.2379        |
| Mean                                                                      | 0.2032     | 0.2027      | 0.1993     | 0.2017    | 0.2013    | 0.2004    | 0.2086     | 0.2194    | 0.2234     | 0.2332        | 0.1545     | <u>0.2583</u> | 0.2249     | 0.2185     | 0.2261     | 0.2176     | 0.2276      | 0.2178     | 0.2201      | 0.2220        |
| <b>Cluster 3: (positively skewed) unimodal LGD distribution</b>           |            |             |            |           |           |           |            |           |            |               |            |               |            |            |            |            |             |            |             |               |
| Split                                                                     | <i>OLS</i> | <i>bOLS</i> | <i>LAR</i> | <i>RR</i> | <i>LR</i> | <i>ER</i> | <i>FLR</i> | <i>RT</i> | <i>CIT</i> | <i>RF</i>     | <i>ADA</i> | <i>GB</i>     | <i>CUB</i> | <i>ANN</i> | <i>SVR</i> | <i>RVR</i> | <i>GAPR</i> | <i>KNN</i> | <i>MARS</i> | <i>FMM</i>    |
| 60/40                                                                     | 0.1357     | 0.1497      | 0.1052     | 0.1545    | 0.1474    | 0.1450    | 0.1163     | 0.2877    | 0.3134     | 0.3708        | 0.1892     | 0.3670        | 0.3301     | 0.1597     | 0.3303     | 0.3115     | 0.3283      | 0.3258     | 0.2812      | 0.4825        |
| 70/30                                                                     | 0.1463     | 0.1479      | 0.1342     | 0.1503    | 0.1522    | 0.1612    | 0.1339     | 0.2909    | 0.3189     | 0.4210        | 0.1887     | 0.3952        | 0.3711     | 0.1695     | 0.3664     | 0.3326     | 0.3421      | 0.3422     | 0.2763      | 0.5674        |
| 80/20                                                                     | 0.1793     | 0.1563      | 0.1356     | 0.1702    | 0.1731    | 0.1727    | 0.1445     | 0.3009    | 0.3335     | 0.4329        | 0.2148     | 0.4134        | 0.3899     | 0.1878     | 0.3832     | 0.3225     | 0.3434      | 0.3495     | 0.2965      | 0.5300        |
| 90/10                                                                     | 0.2033     | 0.1845      | 0.1500     | 0.1837    | 0.1901    | 0.1855    | 0.1882     | 0.3204    | 0.3472     | 0.4553        | 0.2735     | 0.4590        | 0.4252     | 0.2256     | 0.4296     | 0.3579     | 0.3706      | 0.3520     | 0.3199      | 0.5404        |
| Mean                                                                      | 0.1661     | 0.1596      | 0.1313     | 0.1647    | 0.1657    | 0.1661    | 0.1457     | 0.3000    | 0.3282     | 0.4200        | 0.2165     | 0.4086        | 0.3791     | 0.1856     | 0.3773     | 0.3311     | 0.3461      | 0.3424     | 0.2935      | <u>0.5301</u> |

**Table OA.5: Inclusion of enterprise-specific variables: Descriptive statistics.**

Note. The table presents the means and quantiles of empirical LGDs (in %) for different loan categories.

|                                                   | Quantiles |       |       |       |        | Mean  | Obs. |
|---------------------------------------------------|-----------|-------|-------|-------|--------|-------|------|
|                                                   | 0.05      | 0.25  | 0.50  | 0.75  | 0.95   |       |      |
| <i>LGD<sub>overall</sub></i>                      | -3.00     | 0.79  | 3.17  | 52.51 | 97.50  | 25.51 | 4268 |
| log( <i>EAD</i> )                                 | 8.24      | 9.56  | 10.59 | 12.20 | 14.37  | 10.91 | 4268 |
| Number of collateralals                           | 0.00      | 0.00  | 1.00  | 1.00  | 4.00   | 1.13  | 4268 |
| Number of guarantors                              | 0.00      | 0.00  | 0.00  | 0.00  | 4.00   | 0.52  | 4268 |
| log(Entity sales)                                 | 10.974    | 13.17 | 14.25 | 15.45 | 17.00  | 14.10 | 4268 |
| log(Entity assets)                                | 11.52     | 13.55 | 14.60 | 15.40 | 16.80  | 14.38 | 4268 |
| log(Entity total debt)                            | 10.98     | 13.18 | 14.29 | 15.08 | 16.44  | 13.97 | 4268 |
| <i>LGD conditional to guarantee availability:</i> |           |       |       |       |        |       |      |
| No guarantee                                      | -4.90     | 0.40  | 15.74 | 56.17 | 89.49  | 28.05 | 3673 |
| Guarantee                                         | -2.70     | 0.83  | 2.87  | 51.27 | 97.76  | 25.10 | 595  |
| <i>LGD conditional to collateral type:</i>        |           |       |       |       |        |       |      |
| No collateral                                     | -4.60     | 0.22  | 22.36 | 64.64 | 96.35  | 33.24 | 2064 |
| Real estate                                       | -6.15     | 0.19  | 8.28  | 57.02 | 95.01  | 27.53 | 574  |
| Other                                             | 0.38      | 1.05  | 1.96  | 5.11  | 100.00 | 15.00 | 2064 |
| <i>LGD conditional to facility type:</i>          |           |       |       |       |        |       |      |
| Medium term                                       | -2.81     | 0.85  | 3.25  | 52.09 | 96.37  | 25.41 | 3987 |
| Short term                                        | -9.13     | 0.15  | 2.47  | 67.74 | 100.00 | 28.48 | 234  |
| Other                                             | -9.55     | 0.01  | 0.93  | 31.46 | 97.87  | 18.70 | 47   |
| <i>LGD conditional to seniority type:</i>         |           |       |       |       |        |       |      |
| Pari-passu                                        | -5.32     | 0.00  | 3.29  | 48.68 | 97.59  | 23.51 | 1569 |
| Super senior                                      | -0.78     | 1.09  | 2.92  | 55.03 | 97.56  | 26.19 | 2602 |
| Non senior                                        | 0.12      | 6.54  | 30.73 | 68.80 | 91.79  | 39.57 | 97   |
| <i>LGD conditional to industry type:</i>          |           |       |       |       |        |       |      |
| Finance, insurance, real estate                   | -6.76     | 0.37  | 5.89  | 51.31 | 94.38  | 25.60 | 343  |
| Agriculture, forestry, fishing, hunting           | -6.27     | -1.82 | 4.09  | 55.09 | 100.00 | 26.34 | 111  |
| Mining                                            | -3.71     | 0.93  | 1.12  | 34.13 | 96.40  | 20.41 | 50   |
| Construction                                      | -2.76     | 0.21  | 2.27  | 48.16 | 95.74  | 24.05 | 518  |
| Manufacturing                                     | -7.18     | 0.26  | 5.68  | 61.01 | 97.57  | 27.35 | 432  |
| Transp., commu.,elec., gas, sani. serv.           | -0.40     | 1.03  | 1.93  | 29.70 | 87.10  | 17.80 | 1269 |
| Wholesale and retail trade                        | -2.18     | 0.42  | 3.00  | 52.09 | 97.10  | 26.36 | 835  |
| Services                                          | -1.60     | 0.71  | 15.08 | 83.80 | 99.41  | 35.72 | 251  |
| Other                                             | -5.33     | 3.84  | 33.43 | 72.83 | 100.00 | 39.89 | 459  |



**Table OA.6: Inclusion of enterprise-specific variables: Out-of-sample estimation accuracies (MAE).**

Note. This table reports the MAE of the out-of-sample estimation for the considered LGD methods. High values for MAE imply a bad fit.

| <b>Cluster 1: (nearly) symmetric bimodal LGD distribution</b>             |        |        |        |        |        |        |        |        |        |               |        |               |        |        |        |        |        |        |        |               |
|---------------------------------------------------------------------------|--------|--------|--------|--------|--------|--------|--------|--------|--------|---------------|--------|---------------|--------|--------|--------|--------|--------|--------|--------|---------------|
| Split                                                                     | OLS    | bOLS   | LAR    | RR     | LR     | ER     | FLR    | RT     | CIT    | RF            | ADA    | GB            | CUB    | ANN    | SVR    | RVR    | GAPR   | KNN    | MARS   | FMM           |
| 60/40                                                                     | 0.2883 | 0.2901 | 0.2883 | 0.2892 | 0.3016 | 0.3003 | 0.2861 | 0.3028 | 0.2816 | 0.2829        | 0.3012 | 0.2782        | 0.2847 | 0.2881 | 0.2958 | 0.2925 | 0.2880 | 0.3137 | 0.2859 | 0.2819        |
| 70/30                                                                     | 0.2835 | 0.2884 | 0.2861 | 0.2862 | 0.2920 | 0.2911 | 0.2851 | 0.2947 | 0.2804 | 0.2821        | 0.2998 | 0.2891        | 0.2826 | 0.2870 | 0.2930 | 0.2888 | 0.2904 | 0.3090 | 0.2886 | 0.2826        |
| 80/20                                                                     | 0.2819 | 0.2872 | 0.2864 | 0.2879 | 0.2895 | 0.2908 | 0.2868 | 0.2918 | 0.2870 | 0.2764        | 0.2972 | 0.2809        | 0.2765 | 0.2862 | 0.2933 | 0.2864 | 0.2874 | 0.2877 | 0.2871 | 0.2766        |
| 90/10                                                                     | 0.2911 | 0.2816 | 0.2837 | 0.2842 | 0.2779 | 0.2800 | 0.2827 | 0.2806 | 0.2802 | 0.2728        | 0.2910 | 0.2661        | 0.2713 | 0.2803 | 0.2831 | 0.2773 | 0.2847 | 0.2834 | 0.2822 | 0.2736        |
| Mean                                                                      | 0.2862 | 0.2868 | 0.2861 | 0.2869 | 0.2902 | 0.2906 | 0.2852 | 0.2925 | 0.2823 | <u>0.2786</u> | 0.2973 | <u>0.2786</u> | 0.2788 | 0.2854 | 0.2913 | 0.2862 | 0.2876 | 0.2985 | 0.2860 | 0.2787        |
| <b>Cluster 2: asymmetric (positively skewed) bimodal LGD distribution</b> |        |        |        |        |        |        |        |        |        |               |        |               |        |        |        |        |        |        |        |               |
| Split                                                                     | OLS    | bOLS   | LAR    | RR     | LR     | ER     | FLR    | RT     | CIT    | RF            | ADA    | GB            | CUB    | ANN    | SVR    | RVR    | GAPR   | KNN    | MARS   | FMM           |
| 60/40                                                                     | 0.2668 | 0.2647 | 0.2618 | 0.2637 | 0.2708 | 0.2676 | 0.2605 | 0.2543 | 0.2452 | 0.2668        | 0.2796 | 0.2546        | 0.2528 | 0.2459 | 0.2693 | 0.2461 | 0.2724 | 0.2648 | 0.2540 | 0.2306        |
| 70/30                                                                     | 0.2630 | 0.2721 | 0.2689 | 0.2684 | 0.2830 | 0.2778 | 0.2774 | 0.2592 | 0.2569 | 0.2753        | 0.2955 | 0.2544        | 0.2515 | 0.2627 | 0.2752 | 0.2638 | 0.2690 | 0.2744 | 0.2586 | 0.2708        |
| 80/20                                                                     | 0.2600 | 0.2748 | 0.2836 | 0.2634 | 0.2796 | 0.2734 | 0.2706 | 0.2490 | 0.2515 | 0.2513        | 0.3072 | 0.2354        | 0.2421 | 0.2560 | 0.2615 | 0.2569 | 0.2559 | 0.2679 | 0.2508 | 0.3208        |
| 90/10                                                                     | 0.2784 | 0.2891 | 0.2901 | 0.2840 | 0.2926 | 0.2918 | 0.3044 | 0.2403 | 0.2232 | 0.2381        | 0.3141 | 0.2312        | 0.2692 | 0.2263 | 0.2522 | 0.2276 | 0.2469 | 0.2505 | 0.2362 | 0.2730        |
| Mean                                                                      | 0.2671 | 0.2752 | 0.2761 | 0.2699 | 0.2815 | 0.2777 | 0.2782 | 0.2507 | 0.2442 | 0.2578        | 0.2991 | <u>0.2439</u> | 0.2539 | 0.2477 | 0.2646 | 0.2486 | 0.2611 | 0.2644 | 0.2499 | 0.2738        |
| <b>Cluster 3: (positively skewed) unimodal LGD distribution</b>           |        |        |        |        |        |        |        |        |        |               |        |               |        |        |        |        |        |        |        |               |
| Split                                                                     | OLS    | bOLS   | LAR    | RR     | LR     | ER     | FLR    | RT     | CIT    | RF            | ADA    | GB            | CUB    | ANN    | SVR    | RVR    | GAPR   | KNN    | MARS   | FMM           |
| 60/40                                                                     | 0.2034 | 0.2079 | 0.2299 | 0.2057 | 0.2276 | 0.2275 | 0.2536 | 0.1415 | 0.1508 | 0.1817        | 0.2219 | 0.1667        | 0.1412 | 0.2219 | 0.2107 | 0.1689 | 0.1666 | 0.1405 | 0.1730 | 0.1248        |
| 70/30                                                                     | 0.2064 | 0.2083 | 0.2240 | 0.2089 | 0.2221 | 0.2232 | 0.2532 | 0.1459 | 0.1507 | 0.1718        | 0.2364 | 0.1588        | 0.1382 | 0.2381 | 0.2081 | 0.1657 | 0.1668 | 0.1453 | 0.1701 | 0.1237        |
| 80/20                                                                     | 0.2053 | 0.2088 | 0.1844 | 0.2053 | 0.2275 | 0.2272 | 0.2538 | 0.1419 | 0.1479 | 0.1734        | 0.2062 | 0.1716        | 0.1340 | 0.2084 | 0.2074 | 0.1672 | 0.1625 | 0.1355 | 0.1693 | 0.1175        |
| 90/10                                                                     | 0.2097 | 0.2095 | 0.2322 | 0.2097 | 0.2296 | 0.2282 | 0.2435 | 0.1375 | 0.1443 | 0.1698        | 0.1925 | 0.1481        | 0.1280 | 0.1925 | 0.2066 | 0.1707 | 0.1599 | 0.1368 | 0.1723 | 0.1126        |
| Mean                                                                      | 0.2062 | 0.2086 | 0.2176 | 0.2074 | 0.2267 | 0.2265 | 0.2510 | 0.1417 | 0.1484 | 0.1742        | 0.2142 | 0.1613        | 0.1354 | 0.2152 | 0.2082 | 0.1681 | 0.1640 | 0.1395 | 0.1712 | <u>0.1197</u> |

**Table OA.7: Inclusion of enterprise-specific variables: Out-of-sample estimation accuracies ( $R^2$ ).**

Note. This table reports the  $R^2$  of the out-of-sample estimation for the considered LGD methods. Low values for  $R^2$  imply a bad fit.

| <b>Cluster 1: (nearly) symmetric bimodal LGD distribution</b>             |            |             |            |           |           |           |            |           |            |               |            |               |            |            |            |            |             |            |             |               |
|---------------------------------------------------------------------------|------------|-------------|------------|-----------|-----------|-----------|------------|-----------|------------|---------------|------------|---------------|------------|------------|------------|------------|-------------|------------|-------------|---------------|
| Split                                                                     | <i>OLS</i> | <i>bOLS</i> | <i>LAR</i> | <i>RR</i> | <i>LR</i> | <i>ER</i> | <i>FLR</i> | <i>RT</i> | <i>CIT</i> | <i>RF</i>     | <i>ADA</i> | <i>GB</i>     | <i>CUB</i> | <i>ANN</i> | <i>SVR</i> | <i>RVR</i> | <i>GAPR</i> | <i>KNN</i> | <i>MARS</i> | <i>FMM</i>    |
| 60/40                                                                     | 0.1230     | 0.1128      | 0.1230     | 0.1195    | 0.1198    | 0.1249    | 0.1366     | 0.1130    | 0.1370     | 0.1851        | 0.1345     | 0.1584        | 0.1075     | 0.1266     | 0.1525     | 0.1022     | 0.1429      | 0.0624     | 0.1354      | 0.1229        |
| 70/30                                                                     | 0.1633     | 0.1421      | 0.1499     | 0.1507    | 0.1583    | 0.1521    | 0.1572     | 0.1324    | 0.1659     | 0.2202        | 0.1563     | 0.1675        | 0.1497     | 0.1475     | 0.1772     | 0.1360     | 0.1590      | 0.0945     | 0.1598      | 0.1497        |
| 80/20                                                                     | 0.2211     | 0.2047      | 0.1990     | 0.1918    | 0.1965    | 0.1901    | 0.1970     | 0.1850    | 0.1874     | 0.2626        | 0.2043     | 0.1783        | 0.2145     | 0.2005     | 0.2041     | 0.1990     | 0.2065      | 0.1561     | 0.1986      | 0.2142        |
| 90/10                                                                     | 0.2212     | 0.2625      | 0.2527     | 0.2492    | 0.2383    | 0.2438    | 0.2292     | 0.2408    | 0.2502     | 0.2921        | 0.2336     | 0.2798        | 0.2589     | 0.2367     | 0.2430     | 0.2805     | 0.2647      | 0.1975     | 0.2363      | 0.2500        |
| Mean                                                                      | 0.1822     | 0.1805      | 0.1811     | 0.1778    | 0.1782    | 0.1777    | 0.1800     | 0.1678    | 0.1851     | <u>0.2400</u> | 0.1822     | 0.1960        | 0.1826     | 0.1778     | 0.1942     | 0.1794     | 0.1933      | 0.1276     | 0.1826      | 0.1842        |
| <b>Cluster 2: asymmetric (positively skewed) bimodal LGD distribution</b> |            |             |            |           |           |           |            |           |            |               |            |               |            |            |            |            |             |            |             |               |
| Split                                                                     | <i>OLS</i> | <i>bOLS</i> | <i>LAR</i> | <i>RR</i> | <i>LR</i> | <i>ER</i> | <i>FLR</i> | <i>RT</i> | <i>CIT</i> | <i>RF</i>     | <i>ADA</i> | <i>GB</i>     | <i>CUB</i> | <i>ANN</i> | <i>SVR</i> | <i>RVR</i> | <i>GAPR</i> | <i>KNN</i> | <i>MARS</i> | <i>FMM</i>    |
| 60/40                                                                     | 0.3580     | 0.3676      | 0.3687     | 0.3637    | 0.3724    | 0.3693    | 0.3768     | 0.3676    | 0.3727     | 0.3785        | 0.3745     | 0.3809        | 0.3628     | 0.3627     | 0.3721     | 0.3590     | 0.3634      | 0.3741     | 0.3708      | 0.3715        |
| 70/30                                                                     | 0.3790     | 0.3754      | 0.3766     | 0.3700    | 0.3691    | 0.3713    | 0.3812     | 0.4118    | 0.3954     | 0.3898        | 0.3799     | 0.3924        | 0.3834     | 0.3816     | 0.3692     | 0.3788     | 0.3851      | 0.3839     | 0.4133      | 0.3884        |
| 80/20                                                                     | 0.3606     | 0.3617      | 0.3483     | 0.3524    | 0.3468    | 0.3489    | 0.3530     | 0.3850    | 0.3904     | 0.4239        | 0.3519     | 0.4366        | 0.3977     | 0.3793     | 0.4153     | 0.3770     | 0.4284      | 0.3606     | 0.3839      | 0.3800        |
| 90/10                                                                     | 0.3310     | 0.3284      | 0.3176     | 0.3313    | 0.3276    | 0.3276    | 0.3394     | 0.3402    | 0.3550     | 0.3896        | 0.3070     | 0.4063        | 0.4042     | 0.3430     | 0.3957     | 0.3381     | 0.4097      | 0.3239     | 0.3559      | 0.4048        |
| Mean                                                                      | 0.3572     | 0.3583      | 0.3528     | 0.3544    | 0.3540    | 0.3543    | 0.3626     | 0.3761    | 0.3784     | 0.3954        | 0.3533     | <u>0.4041</u> | 0.3870     | 0.3667     | 0.3881     | 0.3632     | 0.3966      | 0.3606     | 0.3810      | 0.3862        |
| <b>Cluster 3: (positively skewed) unimodal LGD distribution</b>           |            |             |            |           |           |           |            |           |            |               |            |               |            |            |            |            |             |            |             |               |
| Split                                                                     | <i>OLS</i> | <i>bOLS</i> | <i>LAR</i> | <i>RR</i> | <i>LR</i> | <i>ER</i> | <i>FLR</i> | <i>RT</i> | <i>CIT</i> | <i>RF</i>     | <i>ADA</i> | <i>GB</i>     | <i>CUB</i> | <i>ANN</i> | <i>SVR</i> | <i>RVR</i> | <i>GAPR</i> | <i>KNN</i> | <i>MARS</i> | <i>FMM</i>    |
| 60/40                                                                     | 0.0298     | -0.0038     | -0.0265    | 0.0055    | 0.0103    | 0.0107    | -0.0265    | 0.1465    | 0.1844     | 0.2807        | 0.0416     | 0.2764        | 0.2335     | 0.0416     | 0.2722     | 0.1748     | 0.2143      | 0.1625     | 0.1341      | 0.4033        |
| 70/30                                                                     | 0.0303     | 0.0261      | -0.0011    | 0.0055    | 0.0553    | 0.0492    | 0.0095     | 0.1888    | 0.2278     | 0.3391        | 0.0865     | 0.3245        | 0.2930     | 0.0708     | 0.3050     | 0.2204     | 0.2250      | 0.1936     | 0.1781      | 0.4362        |
| 80/20                                                                     | 0.0566     | 0.0202      | -0.0058    | 0.0567    | 0.0306    | 0.0310    | -0.0030    | 0.1994    | 0.2292     | 0.3481        | 0.0907     | 0.3307        | 0.2946     | 0.0690     | 0.3040     | 0.2079     | 0.2432      | 0.1936     | 0.1866      | 0.4636        |
| 90/10                                                                     | 0.0741     | 0.0773      | 0.0455     | 0.0741    | 0.0637    | 0.0708    | 0.1044     | 0.2597    | 0.2697     | 0.3706        | 0.1485     | 0.3828        | 0.3353     | 0.1485     | 0.3389     | 0.2549     | 0.2704      | 0.2236     | 0.2401      | 0.4863        |
| Mean                                                                      | 0.0477     | 0.0300      | 0.0030     | 0.0354    | 0.0400    | 0.0404    | 0.0211     | 0.1986    | 0.2278     | 0.3346        | 0.0919     | 0.3286        | 0.2891     | 0.0825     | 0.3050     | 0.2145     | 0.2383      | 0.1933     | 0.1847      | <u>0.4474</u> |

**Table OA.8: Clustering based on loan-specific variable: Test statistics for the comparisons of the LGD distributions.**

Note. Values are paired t statistics and U statistics, respectively. \*, \*\*, and \*\*\* imply significance at the 5%, 1%, and 0.1% levels.

| <b>Paired t-tests</b> |             |            |           |
|-----------------------|-------------|------------|-----------|
|                       | Cluster 1   | Cluster 2  | Cluster 3 |
| Cluster 1             | -           |            |           |
| Cluster 2             | -4.9786 *** | -          |           |
| Cluster 3             | 40.1080 *** | 15.9058 ** | -         |

  

| <b>Paired Mann-Whitney U tests</b> |             |             |           |
|------------------------------------|-------------|-------------|-----------|
|                                    | Cluster 1   | Cluster 2   | Cluster 3 |
| Cluster 1                          | -           |             |           |
| Cluster 2                          | 6.3E+06 *** | -           |           |
| Cluster 3                          | 7.2E+07 *** | 1.6E+06 *** | -         |

**Table OA.9: Clustering based on loan-specific variable: Out-of-sample estimation accuracies (MAE).**

Note. This table reports the MAE of the out-of-sample estimation for the considered LGD methods. High values for MAE imply a bad fit.

| <b>Cluster 1: (nearly) symmetric bimodal LGD distribution</b>             |        |        |        |        |        |        |        |        |        |               |        |               |        |        |        |        |        |        |        |               |
|---------------------------------------------------------------------------|--------|--------|--------|--------|--------|--------|--------|--------|--------|---------------|--------|---------------|--------|--------|--------|--------|--------|--------|--------|---------------|
| Split                                                                     | OLS    | bOLS   | LAR    | RR     | LR     | ER     | FLR    | RT     | CIT    | RF            | ADA    | GB            | CUB    | ANN    | SVR    | RVR    | GAPR   | KNN    | MARS   | FMM           |
| 60/40                                                                     | 0.3119 | 0.3118 | 0.3119 | 0.3128 | 0.3213 | 0.3191 | 0.3165 | 0.3120 | 0.3011 | 0.2910        | 0.3395 | 0.3069        | 0.2890 | 0.3196 | 0.3034 | 0.3041 | 0.3146 | 0.3139 | 0.3097 | 0.3271        |
| 70/30                                                                     | 0.3128 | 0.3122 | 0.3160 | 0.3142 | 0.3221 | 0.3193 | 0.3181 | 0.3043 | 0.3058 | 0.2910        | 0.3375 | 0.3042        | 0.2880 | 0.3017 | 0.3036 | 0.3019 | 0.3157 | 0.3129 | 0.3065 | 0.3288        |
| 80/20                                                                     | 0.3118 | 0.3123 | 0.3127 | 0.3133 | 0.3181 | 0.3167 | 0.3017 | 0.3067 | 0.3018 | 0.2836        | 0.3366 | 0.3047        | 0.2882 | 0.3111 | 0.3048 | 0.3027 | 0.3150 | 0.3074 | 0.3070 | 0.3308        |
| 90/10                                                                     | 0.3113 | 0.3137 | 0.3117 | 0.3121 | 0.3156 | 0.3150 | 0.3006 | 0.3054 | 0.3018 | 0.2800        | 0.3356 | 0.3004        | 0.2815 | 0.3138 | 0.3018 | 0.3010 | 0.3114 | 0.3043 | 0.3063 | 0.3263        |
| Mean                                                                      | 0.3119 | 0.3125 | 0.3131 | 0.3131 | 0.3193 | 0.3175 | 0.3092 | 0.3071 | 0.3026 | <u>0.2864</u> | 0.3373 | 0.3041        | 0.2867 | 0.3116 | 0.3034 | 0.3025 | 0.3142 | 0.3096 | 0.3074 | 0.3283        |
| <b>Cluster 2: asymmetric (positively skewed) bimodal LGD distribution</b> |        |        |        |        |        |        |        |        |        |               |        |               |        |        |        |        |        |        |        |               |
| Split                                                                     | OLS    | bOLS   | LAR    | RR     | LR     | ER     | FLR    | RT     | CIT    | RF            | ADA    | GB            | CUB    | ANN    | SVR    | RVR    | GAPR   | KNN    | MARS   | FMM           |
| 60/40                                                                     | 0.2839 | 0.2843 | 0.2860 | 0.2842 | 0.2880 | 0.2867 | 0.2860 | 0.2732 | 0.2691 | 0.2730        | 0.3236 | 0.2658        | 0.2636 | 0.2968 | 0.2759 | 0.2743 | 0.2716 | 0.2748 | 0.2772 | 0.2690        |
| 70/30                                                                     | 0.2839 | 0.2841 | 0.2856 | 0.2839 | 0.2876 | 0.2867 | 0.2862 | 0.2726 | 0.2720 | 0.2700        | 0.3242 | 0.2612        | 0.2629 | 0.3004 | 0.2756 | 0.2740 | 0.2711 | 0.2760 | 0.2766 | 0.2717        |
| 80/20                                                                     | 0.2842 | 0.2843 | 0.2835 | 0.2844 | 0.2879 | 0.2868 | 0.2506 | 0.2750 | 0.2690 | 0.2701        | 0.3208 | 0.2601        | 0.2617 | 0.2823 | 0.2761 | 0.2710 | 0.2698 | 0.2719 | 0.2765 | 0.2693        |
| 90/10                                                                     | 0.2856 | 0.2854 | 0.2872 | 0.2857 | 0.2892 | 0.2883 | 0.2360 | 0.2744 | 0.2674 | 0.2722        | 0.3222 | 0.2628        | 0.2660 | 0.2836 | 0.2765 | 0.2711 | 0.2694 | 0.2735 | 0.2775 | 0.2676        |
| Mean                                                                      | 0.2844 | 0.2845 | 0.2856 | 0.2846 | 0.2882 | 0.2871 | 0.2647 | 0.2738 | 0.2694 | 0.2713        | 0.3227 | <u>0.2625</u> | 0.2635 | 0.2908 | 0.2760 | 0.2726 | 0.2705 | 0.2741 | 0.2769 | 0.2694        |
| <b>Cluster 3: (positively skewed) unimodal LGD distribution</b>           |        |        |        |        |        |        |        |        |        |               |        |               |        |        |        |        |        |        |        |               |
| Split                                                                     | OLS    | bOLS   | LAR    | RR     | LR     | ER     | FLR    | RT     | CIT    | RF            | ADA    | GB            | CUB    | ANN    | SVR    | RVR    | GAPR   | KNN    | MARS   | FMM           |
| 60/40                                                                     | 0.2059 | 0.2146 | 0.2082 | 0.2054 | 0.2198 | 0.2198 | 0.1903 | 0.1961 | 0.2050 | 0.2000        | 0.2136 | 0.1930        | 0.1948 | 0.2320 | 0.2219 | 0.1980 | 0.2005 | 0.2066 | 0.2114 | 0.1894        |
| 70/30                                                                     | 0.2020 | 0.2064 | 0.2054 | 0.2020 | 0.2125 | 0.2123 | 0.1874 | 0.2042 | 0.2107 | 0.1957        | 0.2115 | 0.1958        | 0.1938 | 0.2206 | 0.2199 | 0.1992 | 0.1991 | 0.2039 | 0.2091 | 0.1406        |
| 80/20                                                                     | 0.2065 | 0.2125 | 0.2086 | 0.2082 | 0.2162 | 0.2162 | 0.1695 | 0.2106 | 0.2145 | 0.2064        | 0.2164 | 0.2071        | 0.2025 | 0.2216 | 0.2234 | 0.1977 | 0.2030 | 0.2037 | 0.2146 | 0.1469        |
| 90/10                                                                     | 0.2160 | 0.2225 | 0.2198 | 0.2191 | 0.2224 | 0.2226 | 0.1789 | 0.2204 | 0.2219 | 0.2072        | 0.2267 | 0.2124        | 0.2035 | 0.2018 | 0.2247 | 0.1969 | 0.2026 | 0.2013 | 0.2253 | 0.2111        |
| Mean                                                                      | 0.2076 | 0.2140 | 0.2105 | 0.2087 | 0.2177 | 0.2177 | 0.1815 | 0.2078 | 0.2130 | 0.2023        | 0.2171 | 0.2021        | 0.1987 | 0.2190 | 0.2225 | 0.1980 | 0.2013 | 0.2038 | 0.2151 | <u>0.1720</u> |

**Table OA.10: Clustering based on loan-specific variable: Out-of-sample estimation accuracies ( $R^2$ ).**

Note. This table reports the  $R^2$  of the out-of-sample estimation for the considered LGD methods. Low values for  $R^2$  imply a bad fit.

| <b>Cluster 1: (nearly) symmetric bimodal LGD distribution</b>             |            |             |            |           |           |           |            |           |            |               |            |               |            |            |            |            |             |            |             |               |
|---------------------------------------------------------------------------|------------|-------------|------------|-----------|-----------|-----------|------------|-----------|------------|---------------|------------|---------------|------------|------------|------------|------------|-------------|------------|-------------|---------------|
| Split                                                                     | <i>OLS</i> | <i>bOLS</i> | <i>LAR</i> | <i>RR</i> | <i>LR</i> | <i>ER</i> | <i>FLR</i> | <i>RT</i> | <i>CIT</i> | <i>RF</i>     | <i>ADA</i> | <i>GB</i>     | <i>CUB</i> | <i>ANN</i> | <i>SVR</i> | <i>RVR</i> | <i>GAPR</i> | <i>KNN</i> | <i>MARS</i> | <i>FMM</i>    |
| 60/40                                                                     | 0.3022     | 0.3025      | 0.3022     | 0.2998    | 0.2987    | 0.2980    | 0.3005     | 0.2999    | 0.3066     | 0.3358        | 0.3017     | 0.3111        | 0.3087     | 0.2998     | 0.3084     | 0.2989     | 0.3041      | 0.2599     | 0.3049      | 0.3113        |
| 70/30                                                                     | 0.3019     | 0.3043      | 0.3019     | 0.2979    | 0.2983    | 0.2994    | 0.2997     | 0.3000    | 0.3052     | 0.3313        | 0.3047     | 0.3195        | 0.3044     | 0.2988     | 0.3119     | 0.3023     | 0.3036      | 0.2637     | 0.3068      | 0.3105        |
| 80/20                                                                     | 0.3155     | 0.3136      | 0.3132     | 0.3117    | 0.3120    | 0.3124    | 0.3128     | 0.3124    | 0.3197     | 0.3624        | 0.3163     | 0.3308        | 0.3231     | 0.3100     | 0.3202     | 0.3112     | 0.3135      | 0.2749     | 0.3213      | 0.3213        |
| 90/10                                                                     | 0.3190     | 0.3117      | 0.3169     | 0.3167    | 0.3159    | 0.3162    | 0.3167     | 0.3170    | 0.3207     | 0.3759        | 0.3156     | 0.3409        | 0.3336     | 0.3182     | 0.3320     | 0.3144     | 0.3190      | 0.2785     | 0.3251      | 0.3257        |
| Mean                                                                      | 0.3096     | 0.3080      | 0.3086     | 0.3065    | 0.3062    | 0.3065    | 0.3074     | 0.3073    | 0.3130     | <u>0.3514</u> | 0.3096     | 0.3256        | 0.3174     | 0.3067     | 0.3181     | 0.3067     | 0.3101      | 0.2693     | 0.3145      | 0.3172        |
| <b>Cluster 2: asymmetric (positively skewed) bimodal LGD distribution</b> |            |             |            |           |           |           |            |           |            |               |            |               |            |            |            |            |             |            |             |               |
| Split                                                                     | <i>OLS</i> | <i>bOLS</i> | <i>LAR</i> | <i>RR</i> | <i>LR</i> | <i>ER</i> | <i>FLR</i> | <i>RT</i> | <i>CIT</i> | <i>RF</i>     | <i>ADA</i> | <i>GB</i>     | <i>CUB</i> | <i>ANN</i> | <i>SVR</i> | <i>RVR</i> | <i>GAPR</i> | <i>KNN</i> | <i>MARS</i> | <i>FMM</i>    |
| 60/40                                                                     | 0.1019     | 0.0998      | 0.0991     | 0.0999    | 0.0995    | 0.1004    | 0.1008     | 0.1034    | 0.1150     | 0.1351        | 0.0739     | 0.1445        | 0.1107     | 0.1050     | 0.1287     | 0.1029     | 0.1244      | 0.1021     | 0.1052      | 0.1159        |
| 70/30                                                                     | 0.1132     | 0.1126      | 0.1106     | 0.1132    | 0.1136    | 0.1125    | 0.1104     | 0.1178    | 0.1284     | 0.1518        | 0.0789     | 0.1631        | 0.1211     | 0.1167     | 0.1433     | 0.1166     | 0.1329      | 0.1145     | 0.1187      | 0.1302        |
| 80/20                                                                     | 0.1117     | 0.1113      | 0.1109     | 0.1108    | 0.1095    | 0.1106    | 0.1139     | 0.1167    | 0.1344     | 0.1534        | 0.0914     | 0.1648        | 0.1207     | 0.1145     | 0.1438     | 0.1150     | 0.1411      | 0.1132     | 0.1210      | 0.1326        |
| 90/10                                                                     | 0.1024     | 0.1023      | 0.0996     | 0.1014    | 0.1004    | 0.1005    | 0.1076     | 0.1085    | 0.1294     | 0.1438        | 0.0864     | 0.1670        | 0.1142     | 0.1113     | 0.1413     | 0.1053     | 0.1435      | 0.1042     | 0.1136      | 0.1275        |
| Mean                                                                      | 0.1073     | 0.1065      | 0.1051     | 0.1063    | 0.1057    | 0.1060    | 0.1082     | 0.1116    | 0.1268     | 0.1460        | 0.0827     | <u>0.1598</u> | 0.1167     | 0.1119     | 0.1393     | 0.1100     | 0.1355      | 0.1085     | 0.1147      | 0.1265        |
| <b>Cluster 3: (positively skewed) unimodal LGD distribution</b>           |            |             |            |           |           |           |            |           |            |               |            |               |            |            |            |            |             |            |             |               |
| Split                                                                     | <i>OLS</i> | <i>bOLS</i> | <i>LAR</i> | <i>RR</i> | <i>LR</i> | <i>ER</i> | <i>FLR</i> | <i>RT</i> | <i>CIT</i> | <i>RF</i>     | <i>ADA</i> | <i>GB</i>     | <i>CUB</i> | <i>ANN</i> | <i>SVR</i> | <i>RVR</i> | <i>GAPR</i> | <i>KNN</i> | <i>MARS</i> | <i>FMM</i>    |
| 60/40                                                                     | 0.2552     | 0.2586      | 0.2389     | 0.2638    | 0.2469    | 0.2469    | 0.2646     | 0.2943    | 0.2993     | 0.3455        | 0.2663     | 0.3205        | 0.3265     | 0.2745     | 0.3028     | 0.3142     | 0.2991      | 0.3035     | 0.2823      | 0.3578        |
| 70/30                                                                     | 0.3334     | 0.3395      | 0.3174     | 0.3343    | 0.3334    | 0.3327    | 0.3314     | 0.3669    | 0.3773     | 0.4127        | 0.3498     | 0.3899        | 0.3933     | 0.3422     | 0.3853     | 0.3739     | 0.3643      | 0.3718     | 0.3678      | 0.4362        |
| 80/20                                                                     | 0.3483     | 0.3471      | 0.3177     | 0.3283    | 0.3337    | 0.3339    | 0.3473     | 0.3631    | 0.3728     | 0.4181        | 0.3416     | 0.3861        | 0.3941     | 0.3408     | 0.3883     | 0.3823     | 0.3770      | 0.3707     | 0.3646      | 0.4401        |
| 90/10                                                                     | 0.3609     | 0.3593      | 0.3320     | 0.3342    | 0.3521    | 0.3449    | 0.3600     | 0.3791    | 0.3877     | 0.4460        | 0.3769     | 0.4059        | 0.3982     | 0.3735     | 0.4043     | 0.4035     | 0.4059      | 0.3814     | 0.3857      | 0.4787        |
| Mean                                                                      | 0.3244     | 0.3261      | 0.3015     | 0.3152    | 0.3165    | 0.3146    | 0.3258     | 0.3508    | 0.3593     | 0.4056        | 0.3337     | 0.3756        | 0.3780     | 0.3327     | 0.3702     | 0.3684     | 0.3616      | 0.3568     | 0.3501      | <u>0.4282</u> |

**Table OA.11: Logarithmic transformation of unimodally distributed LGDs: Descriptive statistics.**

Note. The table presents the means and quantiles of empirical LGDs (in %) for different loan categories.

|                                                   | Quantiles |        |        |        |        | Mean   | Obs. |
|---------------------------------------------------|-----------|--------|--------|--------|--------|--------|------|
|                                                   | 0.05      | 0.25   | 0.50   | 0.75   | 0.95   |        |      |
| <i>LGD<sub>overall</sub></i>                      | -95.34    | -86.64 | -81.92 | -31.77 | 32.05  | -59.61 | 4026 |
| log( <i>EAD</i> )                                 | 8.41      | 9.56   | 10.61  | 12.43  | 15.07  | 11.07  | 4026 |
| Number of collaterals                             | 0.00      | 0.00   | 0.00   | 1.00   | 3.00   | 0.85   | 4026 |
| Number of guarantors                              | 0.00      | 0.00   | 0.00   | 0.00   | 3.00   | 0.42   | 4026 |
| <i>LGD conditional to guarantee availability:</i> |           |        |        |        |        |        |      |
| No guarantee                                      | -98.65    | -87.45 | -73.10 | -10.37 | 15.37  | -52.21 | 3460 |
| Guarantee                                         | -94.66    | -86.55 | -82.60 | -39.90 | 33.53  | -60.82 | 566  |
| <i>LGD conditional to collateral type:</i>        |           |        |        |        |        |        |      |
| No collateral                                     | -109.56   | -88.31 | -72.18 | -1.50  | 31.41  | -50.53 | 2176 |
| Real estate                                       | -87.73    | -85.88 | -82.37 | -57.48 | 34.50  | -64.24 | 428  |
| Other                                             | -98.64    | -88.63 | -81.26 | -11.98 | 28.91  | -55.26 | 1422 |
| <i>LGD conditional to facility type:</i>          |           |        |        |        |        |        |      |
| Medium term                                       | -96.02    | -86.80 | -82.85 | -32.18 | 30.90  | -60.38 | 3601 |
| Short term                                        | -88.60    | -83.65 | -73.29 | -27.44 | 34.50  | -52.85 | 420  |
| Other                                             | -86.88    | -86.57 | -74.51 | -74.51 | -71.93 | -78.77 | 5    |
| <i>LGD conditional to seniority type:</i>         |           |        |        |        |        |        |      |
| Pari-passu                                        | -96.12    | -87.70 | -73.36 | -15.46 | 30.11  | -54.94 | 2246 |
| Super senior                                      | -89.71    | -86.20 | -84.02 | -70.14 | 34.39  | -65.67 | 1716 |
| Non senior                                        | -119.00   | -81.90 | -70.55 | -51.09 | 23.51  | -61.25 | 64   |
| <i>LGD conditional to industry type:</i>          |           |        |        |        |        |        |      |
| Finance, insurance, real estate                   | -101.97   | -86.22 | -55.48 | 2.86   | 34.29  | -42.76 | 352  |
| Agriculture, forestry, fishing, hunting           | -104.55   | -90.01 | -77.90 | 3.36   | 34.50  | -75.12 | 113  |
| Mining                                            | -100.35   | -86.45 | -86.03 | -85.42 | -5.88  | -72.87 | 44   |
| Construction                                      | -96.22    | -88.25 | -83.31 | -49.97 | 31.53  | -63.66 | 447  |
| Manufacturing                                     | -100.61   | -86.92 | -76.00 | -33.64 | 33.69  | -58.65 | 444  |
| Transp., commu.,elec., gas, sani. serv.           | -90.82    | -86.33 | -84.19 | -51.49 | 15.28  | -63.50 | 1282 |
| Wholesale and retail trade                        | -94.12    | -87.67 | -83.66 | -52.01 | 31.27  | -64.55 | 643  |
| Services                                          | -93.45    | -85.58 | -74.36 | -57.48 | 19.92  | -63.16 | 258  |
| Other                                             | -92.31    | -80.58 | -57.23 | -5.62  | 34.50  | -44.13 | 443  |

**Table OA.12: Logarithmic transformation of unimodally distributed LGDs: Out-of-sample estimation accuracies (MAE and  $R^2$ ).**  
 Note. This table reports the MAE and the  $R^2$  of the out-of-sample estimation for the considered LGD methods.

| <b>MAE</b>              |            |             |            |           |           |           |            |           |            |           |            |           |            |            |            |            |             |            |             |               |
|-------------------------|------------|-------------|------------|-----------|-----------|-----------|------------|-----------|------------|-----------|------------|-----------|------------|------------|------------|------------|-------------|------------|-------------|---------------|
| Split                   | <i>OLS</i> | <i>bOLS</i> | <i>LAR</i> | <i>RR</i> | <i>LR</i> | <i>ER</i> | <i>FLR</i> | <i>RT</i> | <i>CIT</i> | <i>RF</i> | <i>ADA</i> | <i>GB</i> | <i>CUB</i> | <i>ANN</i> | <i>SVR</i> | <i>RVR</i> | <i>GAPR</i> | <i>KNN</i> | <i>MARS</i> | <i>FMM</i>    |
| 60/40                   | 0.2285     | 0.2306      | 0.2339     | 0.2293    | 0.2375    | 0.2363    | 0.2297     | 0.1933    | 0.1735     | 0.1668    | 0.1683     | 0.1650    | 0.1653     | 0.2508     | 0.2055     | 0.1960     | 0.1866      | 0.1740     | 0.1998      | 0.1802        |
| 70/30                   | 0.2260     | 0.2247      | 0.2302     | 0.2254    | 0.2331    | 0.2307    | 0.2285     | 0.1858    | 0.1707     | 0.1674    | 0.1617     | 0.1568    | 0.1616     | 0.2041     | 0.2033     | 0.1924     | 0.1861      | 0.1655     | 0.1987      | 0.1669        |
| 80/20                   | 0.2253     | 0.2269      | 0.2310     | 0.2258    | 0.2341    | 0.2323    | 0.2294     | 0.1721    | 0.1697     | 0.1622    | 0.1680     | 0.1601    | 0.1661     | 0.2460     | 0.1999     | 0.1835     | 0.1843      | 0.1728     | 0.1964      | 0.1814        |
| 90/10                   | 0.2212     | 0.2251      | 0.2317     | 0.2219    | 0.2327    | 0.2294    | 0.2478     | 0.1728    | 0.1711     | 0.1590    | 0.1569     | 0.1763    | 0.1625     | 0.2492     | 0.1981     | 0.1795     | 0.1851      | 0.1569     | 0.1853      | 0.1078        |
| Mean                    | 0.2253     | 0.2268      | 0.2317     | 0.2256    | 0.2344    | 0.2322    | 0.2338     | 0.1810    | 0.1712     | 0.1639    | 0.1637     | 0.1645    | 0.1639     | 0.2375     | 0.2017     | 0.1878     | 0.1855      | 0.1673     | 0.1951      | <u>0.1591</u> |
| <b><math>R^2</math></b> |            |             |            |           |           |           |            |           |            |           |            |           |            |            |            |            |             |            |             |               |
| Split                   | <i>OLS</i> | <i>bOLS</i> | <i>LAR</i> | <i>RR</i> | <i>LR</i> | <i>ER</i> | <i>FLR</i> | <i>RT</i> | <i>CIT</i> | <i>RF</i> | <i>ADA</i> | <i>GB</i> | <i>CUB</i> | <i>ANN</i> | <i>SVR</i> | <i>RVR</i> | <i>GAPR</i> | <i>KNN</i> | <i>MARS</i> | <i>FMM</i>    |
| 60/40                   | 0.5425     | 0.5398      | 0.5174     | 0.5386    | 0.5415    | 0.5351    | 0.5355     | 0.6251    | 0.6287     | 0.6838    | 0.5808     | 0.6487    | 0.6425     | 0.5418     | 0.6694     | 0.6054     | 0.6364      | 0.5674     | 0.6074      | 0.7475        |
| 70/30                   | 0.5580     | 0.5643      | 0.5378     | 0.5612    | 0.5623    | 0.5643    | 0.5452     | 0.6340    | 0.6342     | 0.6895    | 0.5835     | 0.6534    | 0.6580     | 0.5686     | 0.6834     | 0.6324     | 0.6476      | 0.5785     | 0.6210      | 0.7565        |
| 80/20                   | 0.5475     | 0.5394      | 0.5178     | 0.5450    | 0.5468    | 0.5471    | 0.5256     | 0.6197    | 0.6268     | 0.6797    | 0.5783     | 0.6513    | 0.6337     | 0.5563     | 0.6761     | 0.6175     | 0.6424      | 0.5644     | 0.6057      | 0.7424        |
| 90/10                   | 0.5513     | 0.5320      | 0.5178     | 0.5481    | 0.5434    | 0.5461    | 0.5217     | 0.6186    | 0.6361     | 0.6889    | 0.5887     | 0.6385    | 0.6445     | 0.5568     | 0.6825     | 0.6161     | 0.6407      | 0.5912     | 0.6252      | 0.7402        |
| Mean                    | 0.5498     | 0.5439      | 0.5227     | 0.5483    | 0.5485    | 0.5482    | 0.5320     | 0.6244    | 0.6314     | 0.6855    | 0.5828     | 0.6480    | 0.6447     | 0.5559     | 0.6779     | 0.6178     | 0.6418      | 0.5754     | 0.6148      | <u>0.7467</u> |

**Table OA.13: Non-European credit portfolios: Descriptive statistics.**

Note. The table presents the means and quantiles of empirical LGDs (in %) for different loan categories.

|                                                   | Quantiles |       |       |        |        | Mean  | Obs. |
|---------------------------------------------------|-----------|-------|-------|--------|--------|-------|------|
|                                                   | 0.05      | 0.25  | 0.50  | 0.75   | 0.95   |       |      |
| <i>LGD<sub>overall</sub></i>                      | -9.52     | -1.17 | 3.83  | 53.63  | 100.00 | 26.29 | 6408 |
| log( <i>EAD</i> )                                 | 9.43      | 11.25 | 12.54 | 13.77  | 15.69  | 12.52 | 6408 |
| Number of collaterals                             | 0.00      | 1.00  | 1.00  | 2.00   | 6.00   | 1.98  | 6408 |
| Number of guarantors                              | 0.00      | 0.00  | 0.00  | 1.00   | 5.00   | 1.11  | 6408 |
| <i>LGD conditional to guarantee availability:</i> |           |       |       |        |        |       |      |
| No guarantee                                      | -9.68     | -0.94 | 5.76  | 59.13  | 100.00 | 27.94 | 4329 |
| Guarantee                                         | -9.26     | -1.57 | 1.78  | 45.92  | 100.00 | 22.84 | 2079 |
| <i>LGD conditional to collateral type:</i>        |           |       |       |        |        |       |      |
| No collateral                                     | -4.38     | 6.36  | 40.98 | 100.00 | 100.00 | 49.27 | 626  |
| Real estate                                       | -12.86    | -2.37 | 3.20  | 38.48  | 95.21  | 20.30 | 1455 |
| Other                                             | -8.79     | -1.27 | 1.87  | 51.38  | 100.00 | 24.97 | 4327 |
| <i>LGD conditional to facility type:</i>          |           |       |       |        |        |       |      |
| Medium term                                       | -9.00     | -0.09 | 7.73  | 61.78  | 100.00 | 29.74 | 4046 |
| Short term                                        | -10.91    | -1.56 | 1.20  | 46.18  | 99.45  | 22.76 | 444  |
| Other                                             | -10.43    | -2.60 | 0.64  | 36.83  | 100.00 | 19.82 | 1918 |
| <i>LGD conditional to seniority type:</i>         |           |       |       |        |        |       |      |
| Pari-passu                                        | -6.18     | 2.47  | 17.89 | 60.01  | 100.00 | 32.45 | 1461 |
| Super senior                                      | -10.29    | -1.86 | 0.75  | 50.45  | 100.00 | 24.00 | 4849 |
| Non senior                                        | -0.03     | 0.76  | 41.74 | 99.54  | 100.78 | 47.24 | 98   |
| <i>LGD conditional to industry type:</i>          |           |       |       |        |        |       |      |
| Finance, insurance, real estate                   | -12.01    | -2.60 | 0.64  | 30.27  | 99.12  | 17.22 | 745  |
| Agriculture, forestry, fishing, hunting           | -12.88    | 0.04  | 2.61  | 27.86  | 100.00 | 19.74 | 269  |
| Mining                                            | -7.39     | -0.17 | 5.25  | 41.66  | 97.89  | 22.16 | 75   |
| Construction                                      | -9.59     | -1.50 | 4.92  | 56.42  | 100.00 | 26.62 | 905  |
| Manufacturing                                     | -9.18     | -1.35 | 1.50  | 45.28  | 100.00 | 22.53 | 981  |
| Transp., commu.,elec., gas, sani. serv.           | -7.24     | -1.62 | 2.05  | 40.81  | 100.00 | 24.33 | 338  |
| Wholesale and retail trade                        | -9.35     | -1.32 | 2.63  | 60.15  | 100.00 | 28.15 | 876  |
| Services                                          | -9.94     | -1.13 | 5.44  | 69.98  | 100.00 | 30.89 | 1401 |
| Other                                             | -6.42     | 1.16  | 17.41 | 63.80  | 100.00 | 32.13 | 818  |



**Table OA.14: Non-European credit portfolios: Out-of-sample estimation accuracies (*MAE*).**

Note. This table reports the *MAE* of the out-of-sample estimation for the Latin American, North American, and Oceanian credit portfolios. High values for *MAE* imply a bad fit.

| <b>Latin American credit portfolio: (nearly) symmetric bimodal LGD distribution</b>             |            |             |            |           |           |           |            |           |            |               |            |               |            |            |            |            |             |            |             |               |
|-------------------------------------------------------------------------------------------------|------------|-------------|------------|-----------|-----------|-----------|------------|-----------|------------|---------------|------------|---------------|------------|------------|------------|------------|-------------|------------|-------------|---------------|
| Split                                                                                           | <i>OLS</i> | <i>bOLS</i> | <i>LAR</i> | <i>RR</i> | <i>LR</i> | <i>ER</i> | <i>FLR</i> | <i>RT</i> | <i>CIT</i> | <i>RF</i>     | <i>ADA</i> | <i>GB</i>     | <i>CUB</i> | <i>ANN</i> | <i>SVR</i> | <i>RVR</i> | <i>GAPR</i> | <i>KNN</i> | <i>MARS</i> | <i>FMM</i>    |
| 60/40                                                                                           | 0.3111     | 0.3170      | 0.3111     | 0.3106    | 0.3245    | 0.3247    | 0.3097     | 0.3072    | 0.3193     | 0.2826        | 0.3216     | 0.3069        | 0.3044     | 0.2653     | 0.3163     | 0.3203     | 0.2946      | 0.2972     | 0.2979      | 0.3083        |
| 70/30                                                                                           | 0.3114     | 0.3213      | 0.3114     | 0.3091    | 0.3208    | 0.3215    | 0.3097     | 0.3078    | 0.3139     | 0.2745        | 0.3139     | 0.2744        | 0.2723     | 0.3275     | 0.3287     | 0.3185     | 0.2600      | 0.2933     | 0.2938      | 0.3013        |
| 80/20                                                                                           | 0.3159     | 0.3307      | 0.3195     | 0.3197    | 0.3311    | 0.3317    | 0.3221     | 0.3233    | 0.3308     | 0.2605        | 0.3290     | 0.2666        | 0.2651     | 0.3321     | 0.3371     | 0.3300     | 0.3226      | 0.2681     | 0.3307      | 0.3168        |
| 90/10                                                                                           | 0.3182     | 0.3304      | 0.3243     | 0.3115    | 0.3370    | 0.3341    | 0.3226     | 0.3130    | 0.3154     | 0.2601        | 0.3319     | 0.2653        | 0.2631     | 0.3425     | 0.3354     | 0.2893     | 0.2885      | 0.3155     | 0.2739      | 0.2917        |
| Mean                                                                                            | 0.3142     | 0.3248      | 0.3166     | 0.3127    | 0.3283    | 0.3280    | 0.3160     | 0.3128    | 0.3199     | <u>0.2694</u> | 0.3241     | 0.2783        | 0.2762     | 0.3168     | 0.3294     | 0.3145     | 0.2914      | 0.2935     | 0.2991      | 0.3045        |
| <b>North American credit portfolio: asymmetric (positively skewed) bimodal LGD distribution</b> |            |             |            |           |           |           |            |           |            |               |            |               |            |            |            |            |             |            |             |               |
| Split                                                                                           | <i>OLS</i> | <i>bOLS</i> | <i>LAR</i> | <i>RR</i> | <i>LR</i> | <i>ER</i> | <i>FLR</i> | <i>RT</i> | <i>CIT</i> | <i>RF</i>     | <i>ADA</i> | <i>GB</i>     | <i>CUB</i> | <i>ANN</i> | <i>SVR</i> | <i>RVR</i> | <i>GAPR</i> | <i>KNN</i> | <i>MARS</i> | <i>FMM</i>    |
| 60/40                                                                                           | 0.3087     | 0.3087      | 0.3087     | 0.3087    | 0.3173    | 0.3139    | 0.3028     | 0.3081    | 0.3094     | 0.2914        | 0.3443     | 0.2870        | 0.2867     | 0.2934     | 0.3115     | 0.2901     | 0.2921      | 0.2958     | 0.3057      | 0.3286        |
| 70/30                                                                                           | 0.3096     | 0.3093      | 0.3096     | 0.3096    | 0.3175    | 0.3144    | 0.3038     | 0.3068    | 0.3051     | 0.2907        | 0.3424     | 0.2866        | 0.2825     | 0.3077     | 0.3113     | 0.2808     | 0.2908      | 0.2961     | 0.2956      | 0.3217        |
| 80/20                                                                                           | 0.3087     | 0.3076      | 0.3093     | 0.3087    | 0.3176    | 0.3148    | 0.3027     | 0.3052    | 0.3072     | 0.2888        | 0.3414     | 0.2741        | 0.2780     | 0.3091     | 0.3109     | 0.2792     | 0.2888      | 0.2944     | 0.2938      | 0.3089        |
| 90/10                                                                                           | 0.3003     | 0.2991      | 0.3003     | 0.3003    | 0.3107    | 0.3144    | 0.2940     | 0.2956    | 0.2970     | 0.2808        | 0.3359     | 0.2626        | 0.2785     | 0.3184     | 0.3025     | 0.2840     | 0.2851      | 0.2873     | 0.2888      | 0.2953        |
| Mean                                                                                            | 0.3068     | 0.3062      | 0.3070     | 0.3068    | 0.3158    | 0.3144    | 0.3008     | 0.3039    | 0.3047     | 0.2879        | 0.3410     | <u>0.2776</u> | 0.2814     | 0.3071     | 0.3090     | 0.2835     | 0.2892      | 0.2934     | 0.2959      | 0.3136        |
| <b>Oceanian credit portfolio: (positively skewed) unimodal LGD distribution</b>                 |            |             |            |           |           |           |            |           |            |               |            |               |            |            |            |            |             |            |             |               |
| Split                                                                                           | <i>OLS</i> | <i>bOLS</i> | <i>LAR</i> | <i>RR</i> | <i>LR</i> | <i>ER</i> | <i>FLR</i> | <i>RT</i> | <i>CIT</i> | <i>RF</i>     | <i>ADA</i> | <i>GB</i>     | <i>CUB</i> | <i>ANN</i> | <i>SVR</i> | <i>RVR</i> | <i>GAPR</i> | <i>KNN</i> | <i>MARS</i> | <i>FMM</i>    |
| 60/40                                                                                           | 0.2360     | 0.2270      | 0.2790     | 0.2415    | 0.2608    | 0.2474    | 0.2741     | 0.2624    | 0.2808     | 0.2204        | 0.2799     | 0.2369        | 0.2353     | 0.3046     | 0.2538     | 0.2811     | 0.2521      | 0.2988     | 0.3075      | 0.1973        |
| 70/30                                                                                           | 0.2373     | 0.2148      | 0.2689     | 0.2269    | 0.2426    | 0.2489    | 0.2642     | 0.2419    | 0.2868     | 0.2376        | 0.2740     | 0.2414        | 0.2214     | 0.2940     | 0.2527     | 0.2869     | 0.2567      | 0.3198     | 0.2983      | 0.1823        |
| 80/20                                                                                           | 0.2411     | 0.2294      | 0.2467     | 0.2077    | 0.2334    | 0.2161    | 0.2802     | 0.2339    | 0.2942     | 0.2393        | 0.2777     | 0.2600        | 0.2037     | 0.2965     | 0.2740     | 0.2794     | 0.2549      | 0.3345     | 0.3000      | 0.1773        |
| 90/10                                                                                           | 0.1992     | 0.1966      | 0.2144     | 0.1686    | 0.2431    | 0.2196    | 0.2935     | 0.2422    | 0.2788     | 0.2507        | 0.2703     | 0.2493        | 0.1628     | 0.3033     | 0.2849     | 0.2864     | 0.2488      | 0.3353     | 0.3056      | 0.1668        |
| Mean                                                                                            | 0.2284     | 0.2169      | 0.2523     | 0.2112    | 0.2450    | 0.2330    | 0.2780     | 0.2451    | 0.2851     | 0.2370        | 0.2755     | 0.2469        | 0.2058     | 0.2996     | 0.2664     | 0.2835     | 0.2531      | 0.3221     | 0.3028      | <u>0.1809</u> |

**Table OA.15: Non-European credit portfolios: Out-of-sample estimation accuracies ( $R^2$ ).**

Note. This table reports the  $R^2$  of the out-of-sample estimation for the considered LGD methods. Low values for  $R^2$  imply a bad fit.

| <b>Latin American credit portfolio: (nearly) symmetric bimodal LGD distribution</b>             |            |             |            |           |           |           |            |           |            |               |            |               |            |            |            |            |             |            |             |               |
|-------------------------------------------------------------------------------------------------|------------|-------------|------------|-----------|-----------|-----------|------------|-----------|------------|---------------|------------|---------------|------------|------------|------------|------------|-------------|------------|-------------|---------------|
| Split                                                                                           | <i>OLS</i> | <i>bOLS</i> | <i>LAR</i> | <i>RR</i> | <i>LR</i> | <i>ER</i> | <i>FLR</i> | <i>RT</i> | <i>CIT</i> | <i>RF</i>     | <i>ADA</i> | <i>GB</i>     | <i>CUB</i> | <i>ANN</i> | <i>SVR</i> | <i>RVR</i> | <i>GAPR</i> | <i>KNN</i> | <i>MARS</i> | <i>FMM</i>    |
| 60/40                                                                                           | 0.2558     | 0.2231      | 0.2621     | 0.2627    | 0.2172    | 0.2163    | 0.2665     | 0.2268    | 0.2502     | 0.3339        | 0.2421     | 0.2093        | 0.2190     | 0.2321     | 0.2418     | 0.2464     | 0.3329      | 0.2339     | 0.2250      | 0.2901        |
| 70/30                                                                                           | 0.2755     | 0.2339      | 0.2755     | 0.2845    | 0.2338    | 0.2390    | 0.2862     | 0.2579    | 0.2719     | 0.4205        | 0.2719     | 0.4124        | 0.4194     | 0.2515     | 0.2612     | 0.2775     | 0.4599      | 0.2517     | 0.2383      | 0.3225        |
| 80/20                                                                                           | 0.2819     | 0.2261      | 0.2704     | 0.2663    | 0.2289    | 0.2254    | 0.2730     | 0.2309    | 0.2660     | 0.4274        | 0.2656     | 0.3611        | 0.3684     | 0.2474     | 0.2451     | 0.2695     | 0.2894      | 0.2294     | 0.2261      | 0.3234        |
| 90/10                                                                                           | 0.2313     | 0.1832      | 0.2174     | 0.2595    | 0.1852    | 0.1800    | 0.2323     | 0.1934    | 0.2841     | 0.3860        | 0.2174     | 0.3622        | 0.3718     | 0.2058     | 0.2263     | 0.2826     | 0.3852      | 0.2198     | 0.2015      | 0.3764        |
| Mean                                                                                            | 0.2611     | 0.2166      | 0.2564     | 0.2682    | 0.2163    | 0.2152    | 0.2645     | 0.2273    | 0.2680     | <u>0.3920</u> | 0.2493     | 0.3362        | 0.3446     | 0.2342     | 0.2436     | 0.2690     | 0.3668      | 0.2337     | 0.2227      | 0.3281        |
| <b>North American credit portfolio: asymmetric (positively skewed) bimodal LGD distribution</b> |            |             |            |           |           |           |            |           |            |               |            |               |            |            |            |            |             |            |             |               |
| Split                                                                                           | <i>OLS</i> | <i>bOLS</i> | <i>LAR</i> | <i>RR</i> | <i>LR</i> | <i>ER</i> | <i>FLR</i> | <i>RT</i> | <i>CIT</i> | <i>RF</i>     | <i>ADA</i> | <i>GB</i>     | <i>CUB</i> | <i>ANN</i> | <i>SVR</i> | <i>RVR</i> | <i>GAPR</i> | <i>KNN</i> | <i>MARS</i> | <i>FMM</i>    |
| 60/40                                                                                           | 0.0896     | 0.0872      | 0.0896     | 0.0897    | 0.0640    | 0.0775    | 0.1094     | 0.0712    | 0.0714     | 0.1550        | 0.0398     | 0.1507        | 0.1088     | 0.0780     | 0.1008     | 0.0754     | 0.1229      | 0.0737     | 0.0843      | 0.1036        |
| 70/30                                                                                           | 0.0864     | 0.0859      | 0.0864     | 0.0865    | 0.0636    | 0.0759    | 0.1066     | 0.0689    | 0.0884     | 0.1603        | 0.0410     | 0.1619        | 0.1364     | 0.0751     | 0.1014     | 0.0744     | 0.1364      | 0.0724     | 0.1238      | 0.1026        |
| 80/20                                                                                           | 0.0969     | 0.1021      | 0.0960     | 0.0969    | 0.0670    | 0.0786    | 0.1176     | 0.0920    | 0.0844     | 0.1744        | 0.0519     | 0.2076        | 0.1657     | 0.0942     | 0.1038     | 0.0868     | 0.1505      | 0.0726     | 0.1369      | 0.1479        |
| 90/10                                                                                           | 0.1035     | 0.1073      | 0.1035     | 0.1036    | 0.0625    | 0.0510    | 0.1253     | 0.0737    | 0.1033     | 0.1667        | 0.0313     | 0.1760        | 0.1225     | 0.0608     | 0.1041     | 0.0609     | 0.1291      | 0.0673     | 0.1312      | 0.1322        |
| Mean                                                                                            | 0.0941     | 0.0956      | 0.0939     | 0.0942    | 0.0643    | 0.0708    | 0.1147     | 0.0765    | 0.0869     | 0.1641        | 0.0410     | <u>0.1741</u> | 0.1334     | 0.0770     | 0.1025     | 0.0744     | 0.1347      | 0.0715     | 0.1191      | 0.1216        |
| <b>Oceanian credit portfolio: (positively skewed) unimodal LGD distribution</b>                 |            |             |            |           |           |           |            |           |            |               |            |               |            |            |            |            |             |            |             |               |
| Split                                                                                           | <i>OLS</i> | <i>bOLS</i> | <i>LAR</i> | <i>RR</i> | <i>LR</i> | <i>ER</i> | <i>FLR</i> | <i>RT</i> | <i>CIT</i> | <i>RF</i>     | <i>ADA</i> | <i>GB</i>     | <i>CUB</i> | <i>ANN</i> | <i>SVR</i> | <i>RVR</i> | <i>GAPR</i> | <i>KNN</i> | <i>MARS</i> | <i>FMM</i>    |
| 60/40                                                                                           | 0.0888     | 0.0856      | 0.0314     | 0.1003    | 0.1065    | 0.1095    | 0.0858     | 0.1038    | 0.0734     | 0.2533        | 0.0978     | 0.1157        | 0.0958     | 0.0782     | 0.0955     | 0.0714     | 0.1357      | 0.0274     | 0.0774      | 0.3725        |
| 70/30                                                                                           | 0.0861     | 0.1012      | 0.0321     | 0.1161    | 0.1076    | 0.1087    | 0.0991     | 0.1128    | 0.0753     | 0.2046        | 0.0978     | 0.1164        | 0.0962     | 0.0783     | 0.0959     | 0.0721     | 0.1463      | 0.0271     | 0.0771      | 0.4274        |
| 80/20                                                                                           | 0.0836     | 0.0865      | 0.0332     | 0.1236    | 0.1092    | 0.1096    | 0.0996     | 0.1131    | 0.0734     | 0.2648        | 0.0982     | 0.1168        | 0.0961     | 0.0784     | 0.0964     | 0.0724     | 0.1793      | 0.0269     | 0.0778      | 0.4437        |
| 90/10                                                                                           | 0.0850     | 0.0990      | 0.0342     | 0.1258    | 0.1142    | 0.1092    | 0.1000     | 0.1138    | 0.0743     | 0.2533        | 0.0976     | 0.1176        | 0.0966     | 0.0843     | 0.0964     | 0.0724     | 0.2033      | 0.0282     | 0.0782      | 0.4604        |
| Mean                                                                                            | 0.0859     | 0.0931      | 0.0327     | 0.1165    | 0.1094    | 0.1093    | 0.0961     | 0.1109    | 0.0741     | 0.2440        | 0.0979     | 0.1166        | 0.0962     | 0.0798     | 0.0961     | 0.0721     | 0.1661      | 0.0274     | 0.0776      | <u>0.4260</u> |
